# Supplementary material for: Identification of sulfate species and their influence on SCR performance of Cu/CHA catalyst
Source: Royal Society of Chemistry journal article supplement (doi:10.1039/c7cy00302a), 2017-01-01
Supplement: c7cy00302a1.pdf [file c7cy00302a1.pdf]

# 1 Supplementary Information

## 2 Identification of sulfate species and their influence on SCR

### 3 performance of Cu/CHA catalyst

4 *Wenkang Su, <sup>\*a,b</sup> Zhenguo Li,<sup>a</sup> Yani Zhang,<sup>a</sup> Chenchen Meng,<sup>b</sup> Junhua Li<sup>\*a</sup>,*

5 <sup>a</sup> State Key Joint Laboratory of Environment Simulation and Pollution Control,

6 School of Environment, Tsinghua University, Beijing 100084, P. R. China

7 <sup>b</sup> Hebei Provincial Academy of Environmental Science, Shijiazhuang 050037 P. R.

8 China.

---

<sup>\*a</sup> Tel.: +86 10 62771093, E-mail address: lijunhua@tsinghua.edu.cn (J. Li).

<sup>\*b</sup> Tel.: +86 0311 89253587, E-mail address: 9510053@qq.com

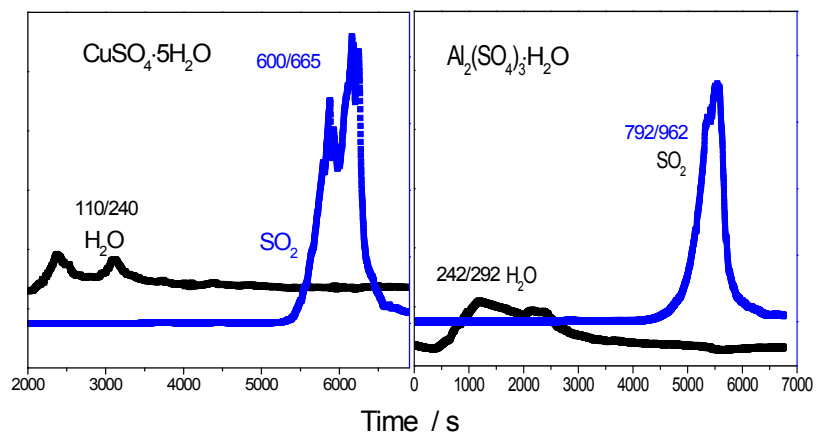

9

10 **Figure S1** MS signal of  $\text{SO}_2$  and  $\text{H}_2\text{O}$  collected as a function of temperature-on-

11 stream during the decomposition of  $\text{CuSO}_4 \cdot 5\text{H}_2\text{O}$  and  $\text{Al}_2(\text{SO}_4)_3 \cdot \text{H}_2\text{O}$

12

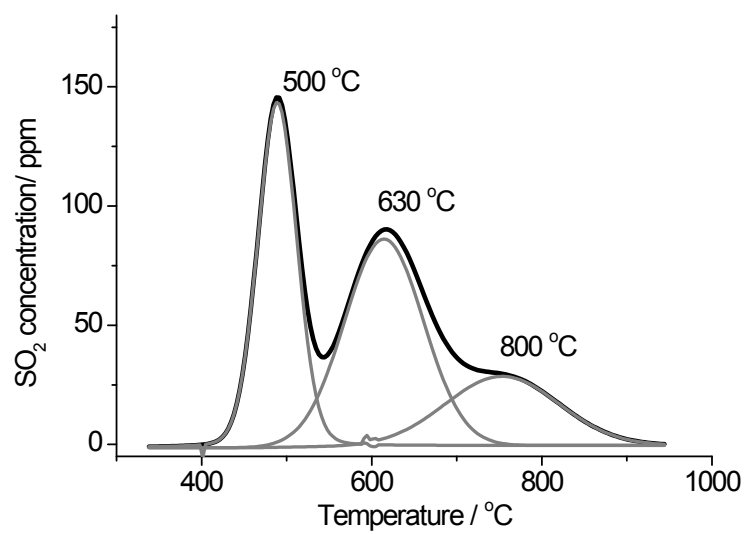

13

14 **Figure S2.** TPD profile of SO<sub>4</sub><sup>2-</sup> radicals on H/SSZ-13 catalysts impregnated with

15 CuSO<sub>4</sub> solution

16

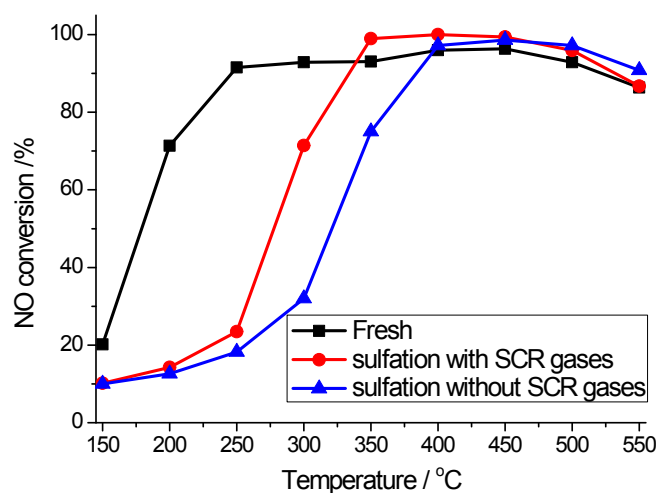

17

18 **Figure S3.** NO conversion as a function of temperature of fresh and sulfated 1.5 wt%

19 Cu/SSZ-13 catalysts Reaction conditions: 500 ppm NO, 500 ppm NH<sub>3</sub>, 5 % O<sub>2</sub>, 5 %

20 H<sub>2</sub>O, balanced with N<sub>2</sub>; GHSV: 170,000 h<sup>-1</sup>. Sulfation conditions: 100 ppm SO<sub>2</sub>, 5 %

21 O<sub>2</sub>, 5 % H<sub>2</sub>O, 500 ppm NO (if used), 500 ppm NH<sub>3</sub> (if used), balanced with N<sub>2</sub>;

22 GHSV: 85,000 h<sup>-1</sup>

23

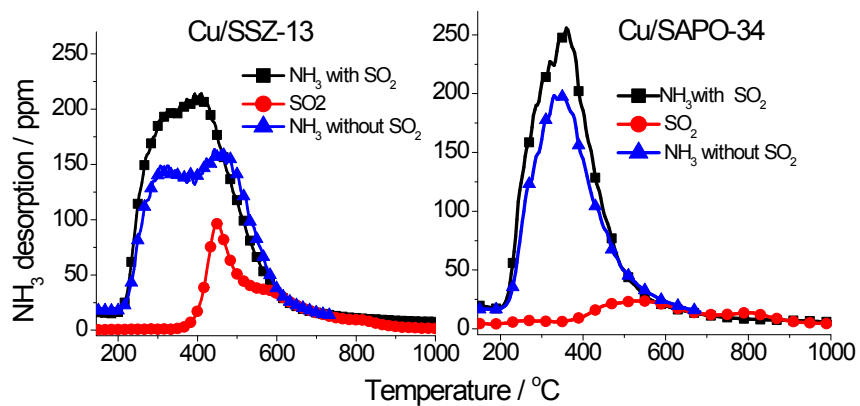

24

25 **Figure S4.** TPD profile of SO<sub>2</sub> and NH<sub>3</sub> on Cu/SSZ-13 and Cu/SAPO-34 catalysts.

26 Sulfation conditions: 500 ppm NH<sub>3</sub>, 500 ppm NO, 5% O<sub>2</sub>, 5% H<sub>2</sub>O, 100 ppm SO<sub>2</sub>, 5%

27 O<sub>2</sub>, 5% H<sub>2</sub>O, T=200°C, GHSV=85,000 h<sup>-1</sup>.
